# Supplementary material for: An aptasensing platform for simultaneous detection of multiple analytes based on the amplification of exonuclease-catalyzed target recycling and DNA concatemers
Source: Royal Society of Chemistry journal article supplement (doi:10.1039/c3an00757j), 2013-01-01
Supplement: c3an00757j.pdf [file c3an00757j.pdf]

*Supporting information*

**An aptasensing platform for simultaneous detection of multiple analytes based on the amplification of exonuclease-catalyzed target recycling and DNA concatamers**

Liping Jiang, Jingdong Peng\*, Yaqin Chai, Ruo Yuan\*, Yali Yuan,  
Lijuan Bai, Yan Wang

*Chongqing Key Laboratory of Analytical Chemistry, College of Chemistry and Chemical Engineering, The Key Laboratory of Eco-environments in Three Gorges Reservoir Region, Southwest University, Chongqing 400715, China*

Fax: +86-23-68253172

E-mail address: [hxpengjd@swu.edu.cn](mailto:hxpengjd@swu.edu.cn), [yuanruo@swu.edu.cn](mailto:yuanruo@swu.edu.cn).

**Table S1**

The sequences of the oligonucleotides.

|         |                                                                                        |
|---------|----------------------------------------------------------------------------------------|
| TBA     | 5'-AAAAGTCCGTGGTAGGGCAGGTTGGGGTGACT-3'                                                 |
| OBA     | 5'-AAAGATCGGGTGTGGGTGGCGTAAAGGGAGCATCGGACA-3'                                          |
| SH-cTBA | 5'-AGTCACCCCAACCTGCCCTACCACGGACT-(CH <sub>2</sub> ) <sub>6</sub> -SH-3'                |
| SH-cOBA | 5'-CCGATGCTCCCTTTACGCCACCCACACCCGATCGG-SH-3'                                           |
| T1      | 5'-AAAAGTCCGTGGTAGGGCAGGTTGGGGTGACTGTACTACAGCAGCTG-3'                                  |
| T2      | 5'-AAAGATCGGGTGTGGGTGGCGTAAAGGGAGCATCGG CATACTCGACGAAGT-3'                             |
| S1      | 5'-ATCTCCTAATAGCAGCAGCTGCTGTAGTAC-3'                                                   |
| S2      | 5'-NH <sub>2</sub> -(CH <sub>2</sub> ) <sub>6</sub> -CTGCTATTAGGAGATGTACTACAGCAGCTG-3' |
| S3      | 5'- <u>GGGTAGGGCGGGTTGGGT</u> TTCATGCAACATCTAGACTTCGTCGAGTATG-3'                       |
| S4      | 5'-CTAGATGTTGCATGACATACTCGACGAAGT-3'                                                   |

\* Corresponding author. Tel.: +86-23-68252277; Fax: +86-23-68253172.

E-mail address: [hxpengjd@swu.edu.cn](mailto:hxpengjd@swu.edu.cn) (J. Peng), [yuanruo@swu.edu.cn](mailto:yuanruo@swu.edu.cn) (R. Yuan)

**Table S2**

Cross-reactivity level of the aptasensor.

| sample type | concentration (nM) | current shift<br>at TB                    | current shift<br>at OTA                   |
|-------------|--------------------|-------------------------------------------|-------------------------------------------|
|             |                    | position ( $\mu\text{A}$ ) <sup>a,b</sup> | position ( $\mu\text{A}$ ) <sup>a,c</sup> |
| TB          | 0.1                | -5.3                                      | -0.1                                      |
|             | 10                 | -8.3                                      | -0.3                                      |
| OTA         | 0.1                | -0.2                                      | -3.9                                      |
|             | 10                 | -0.3                                      | -6.8                                      |
| TB + OTA    | 0.1 + 0.1          | -5.1                                      | -3.7                                      |
|             | 10 + 10            | -8.4                                      | -6.5                                      |

<sup>a</sup> The average value of three measurements.

<sup>b</sup> The background current was -4.2  $\mu\text{A}$  at TB position.

<sup>c</sup> The background current was -3.5  $\mu\text{A}$  at OTA position.

**Table S3**

Analytical application of the aptasensor.

| Sample<br>number | Standard Values / M |                     | Found Values <sup>a</sup> / M |                        | Relative standard<br>deviation / % |     | Recovery / % |       |
|------------------|---------------------|---------------------|-------------------------------|------------------------|------------------------------------|-----|--------------|-------|
|                  | TB                  | OTA                 | TB                            | OTA                    | TB                                 | OTA | TB           | OTA   |
| 1                | $1 \times 10^{-12}$ | $1 \times 10^{-12}$ | $0.99 \times 10^{-12}$        | $0.96 \times 10^{-12}$ | 4.2                                | 3.9 | 98.6         | 96.4  |
| 2                | $1 \times 10^{-11}$ | $1 \times 10^{-11}$ | $1.07 \times 10^{-11}$        | $0.91 \times 10^{-11}$ | 3.6                                | 5.7 | 107.2        | 91.1  |
| 3                | $1 \times 10^{-9}$  | $1 \times 10^{-9}$  | $0.92 \times 10^{-9}$         | $1.02 \times 10^{-9}$  | 6.9                                | 4.8 | 92.3         | 101.5 |
| 4                | $15 \times 10^{-9}$ | $15 \times 10^{-9}$ | $13.72 \times 10^{-9}$        | $14.19 \times 10^{-9}$ | 7.1                                | 5.3 | 91.5         | 94.6  |

<sup>a</sup> Calculated as a mean of three measurements.

### The stability and reproducibility of the aptasensor

Long-term storage stability was also examined. When the resulting aptasensors were stored in refrigerator for 7 days, the average decrease value of peak current was less than 4.6% than that of freshly prepared aptasensors. Therefore, the stability of proposed aptasensor was acceptable.

To elevate the coefficient of variation of intra-assay, aptasensors belonging to the same batch were used to detect three different concentrations of mixed targets. The variation coefficient of five times parallel test were were 4.3 %, 6.4% and 5.0% for 0.1, 1 and 10 nM TB; 3.8%, 7.2% and 5.6% for 0.1, 1 and 10 nM OTA, respectively. Thus, the aptasensor showed a desirable reproducibility.
